# Supplementary material
Source: PubMed Central journal article supplement (PMC3156889)
Supplement: NIHMS265947-supplement-supplement_1.pdf [file NIHMS265947-supplement-supplement_1.pdf]

**Supplementary Table 2.** Mean  $D=(MC)^2$  Scores vs. CDR and Diagnosis

| CDR Score          | $D=(MC)^2$ score (mean $\pm$ SD) |
|--------------------|----------------------------------|
| 0                  | 0.15 $\pm$ 0.45                  |
| 0.5                | 2.86 $\pm$ 0.93                  |
| 1                  | 3.58 $\pm$ 0.56                  |
| 2                  | 3.83 $\pm$ 0.38                  |
| 3                  | 3.83 $\pm$ 0.58                  |
| Clinical Diagnosis |                                  |
| Normal             | 0.17 $\pm$ 0.52                  |
| MCI                | 2.66 $\pm$ 0.87                  |
| Dementia           | 3.42 $\pm$ 0.85                  |

CDR: clinical dementia rating scale; SD: standard deviation; MCI: mild cognitive impairment

**Supplementary Table 1.** CDR Worksheet Questions Excluded From Analysis

---

Worksheet

Item

---

|      |                                                                                |
|------|--------------------------------------------------------------------------------|
| F.1a | What changes have occurred in his/her abilities to perform household chores?   |
| F.1b | What can he/she still do well?                                                 |
| F.2a | What changes have occurred in his/her abilities to perform hobbies?            |
| F.2b | What can he/she still do well?                                                 |
| F.3  | If in nursing home, what can he/she no longer do well (both home and hobbies)? |
| F.4  | Ability to perform household tasks? Please describe:                           |
| E.1  | Is the subject still working?                                                  |
| E.4  | Did he/she ever drive a car?                                                   |
| E.4a | Does the subject drive a car now?                                              |

---

CDR: Clinical Dementia Rating
